# Supplementary material for: Metagenomic Analyses of Multiple Gut Datasets Revealed the Association of Phage Signatures in Colorectal Cancer
Source: PubMed Central journal article supplement (PMC9240273; doi:10.3389/fcimb.2022.918010), 2022-06-15
Supplement: DataSheet_1.pdf [file DataSheet_1.pdf]

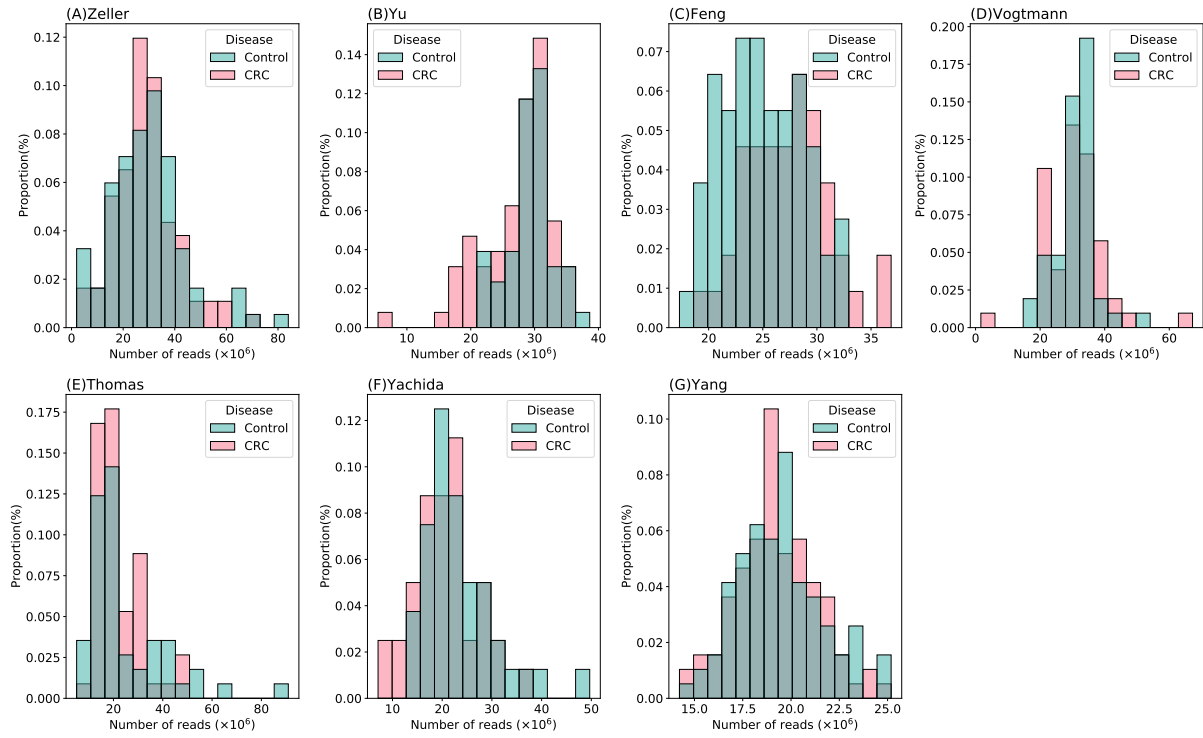

Figure S1: The distribution of sequence depths within each dataset used in this study.

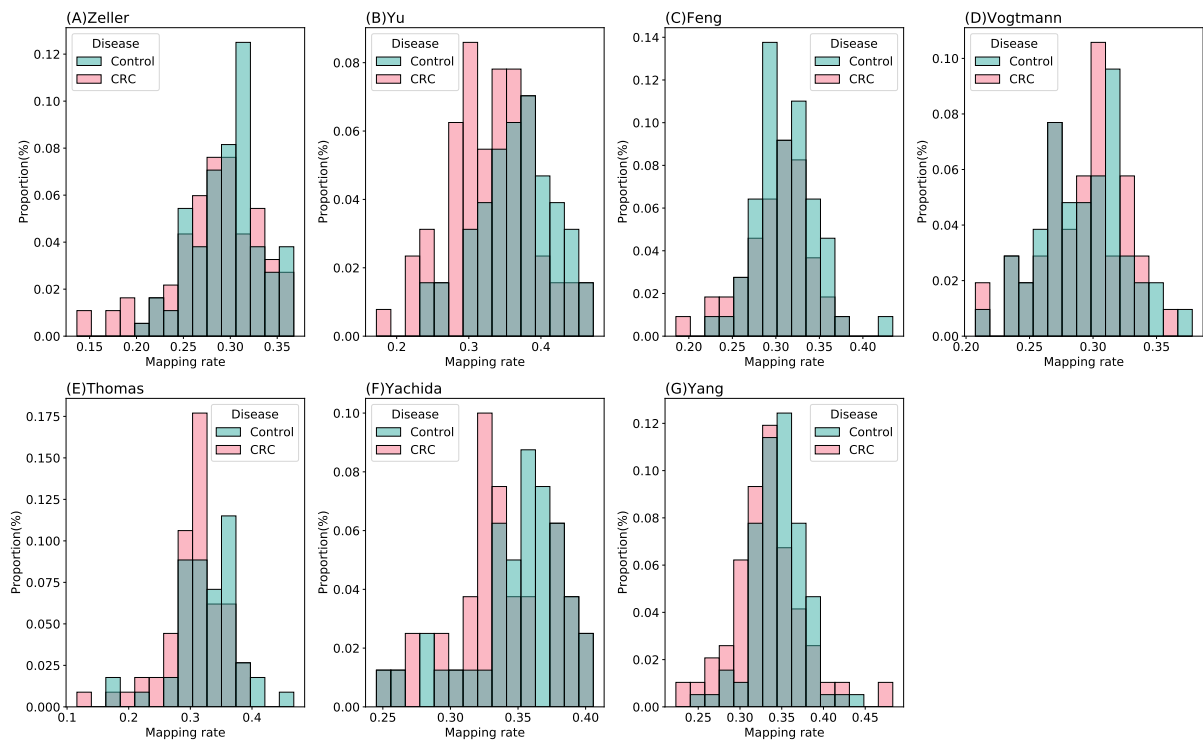

Figure S2: The distribution of mapping rates for each dataset used in this study.

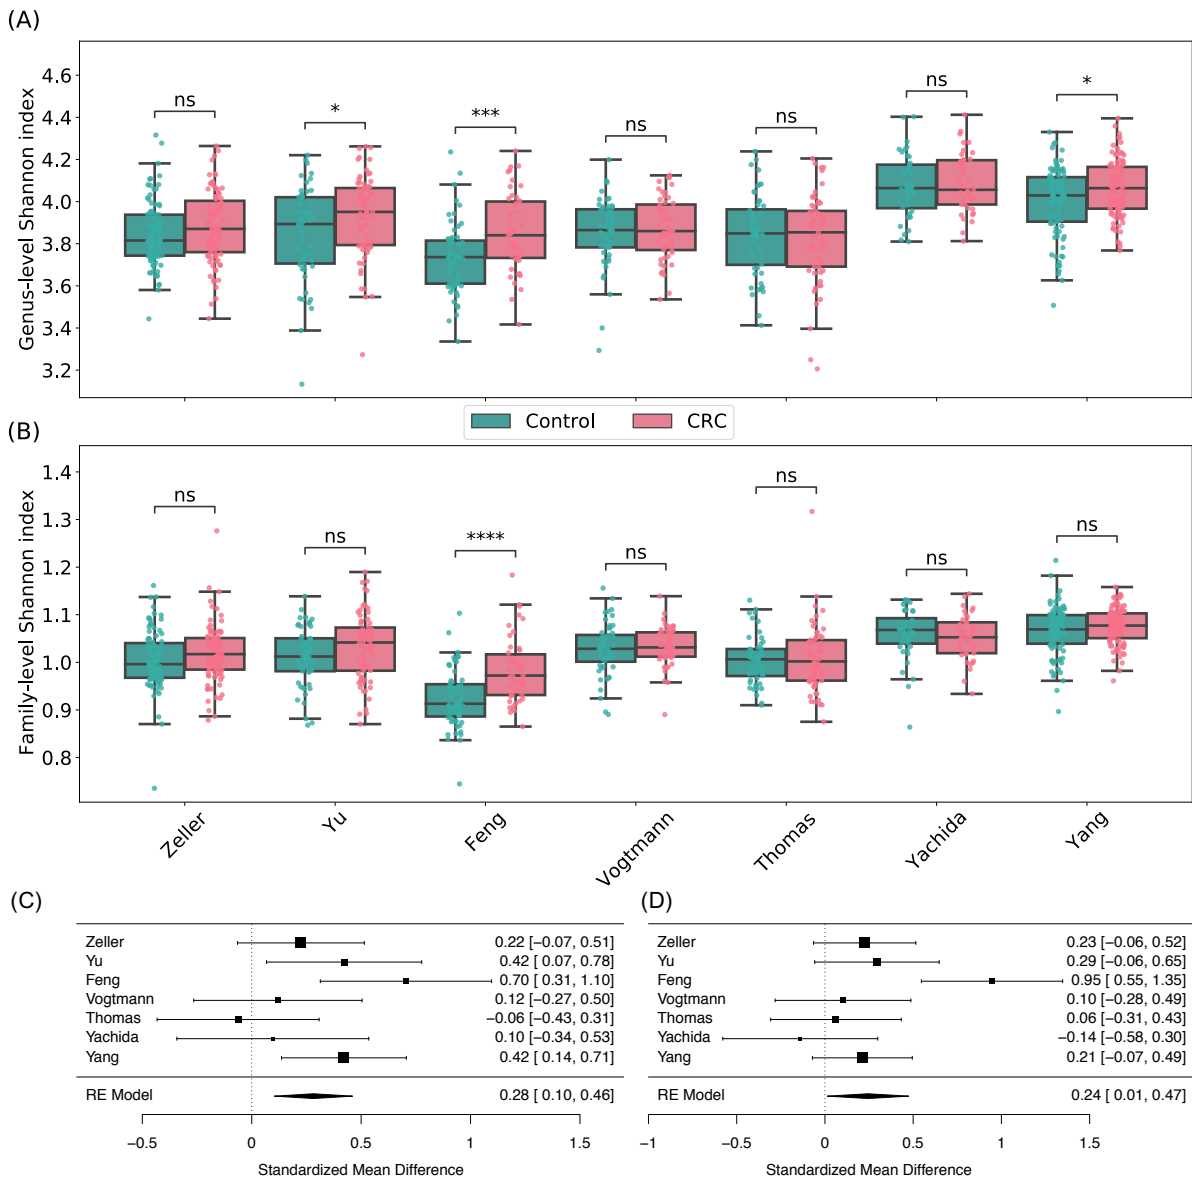

Figure S3: Boxplots of (A) genus-level and (B) family-level Shannon diversity within each dataset. P-values were calculated using the two-tailed Wilcoxon rank-sum test. ns:p> 0.05, \*p< 0.05, \*\*p< 0.01, \*\*\*p< 0.001, \*\*\*\*p< 0.0001. (C) Forest plot showing effect sizes from a meta-analysis on genus-level diversity ( $I^2 = 44.10\%$ , Q test p-value= 0.094). (D) Forest plot showing effect sizes from a meta-analysis on family-level diversity ( $I^2 = 66.51\%$ , Q test p-value= 0.012). RE Model: Random effect model.

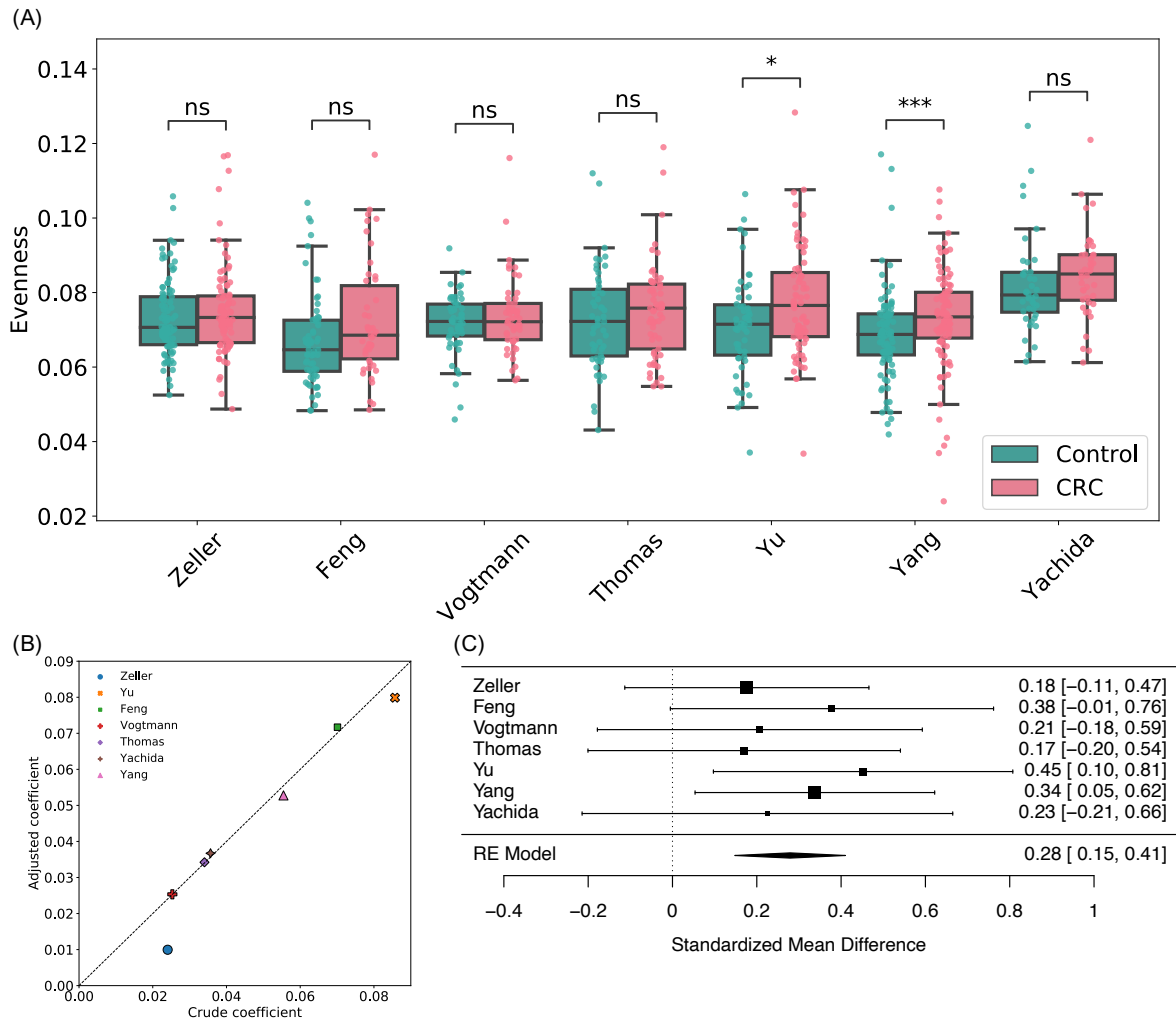

Figure S4: Analysis of viral species Heip evenness within each dataset. (A) Boxplots of viral species-level Heip evenness for gut samples of CRC subjects and healthy controls stratified by disease status in each dataset. BH adjusted p-values were calculated using the two-tailed Wilcoxon rank-sum test. ns:  $p > 0.05$ , \* $p < 0.05$ , \*\* $p < 0.01$ , \*\*\* $p < 0.001$ . (B) Multivariate analysis of the adjusted impact of age, gender and BMI on Heip evenness. (C) Forest plot showing effect sizes from a meta-analysis on species-level evenness ( $I^2 = 0.00\%$ , Q test p-value = 0.89). RE Model: Random effect model.

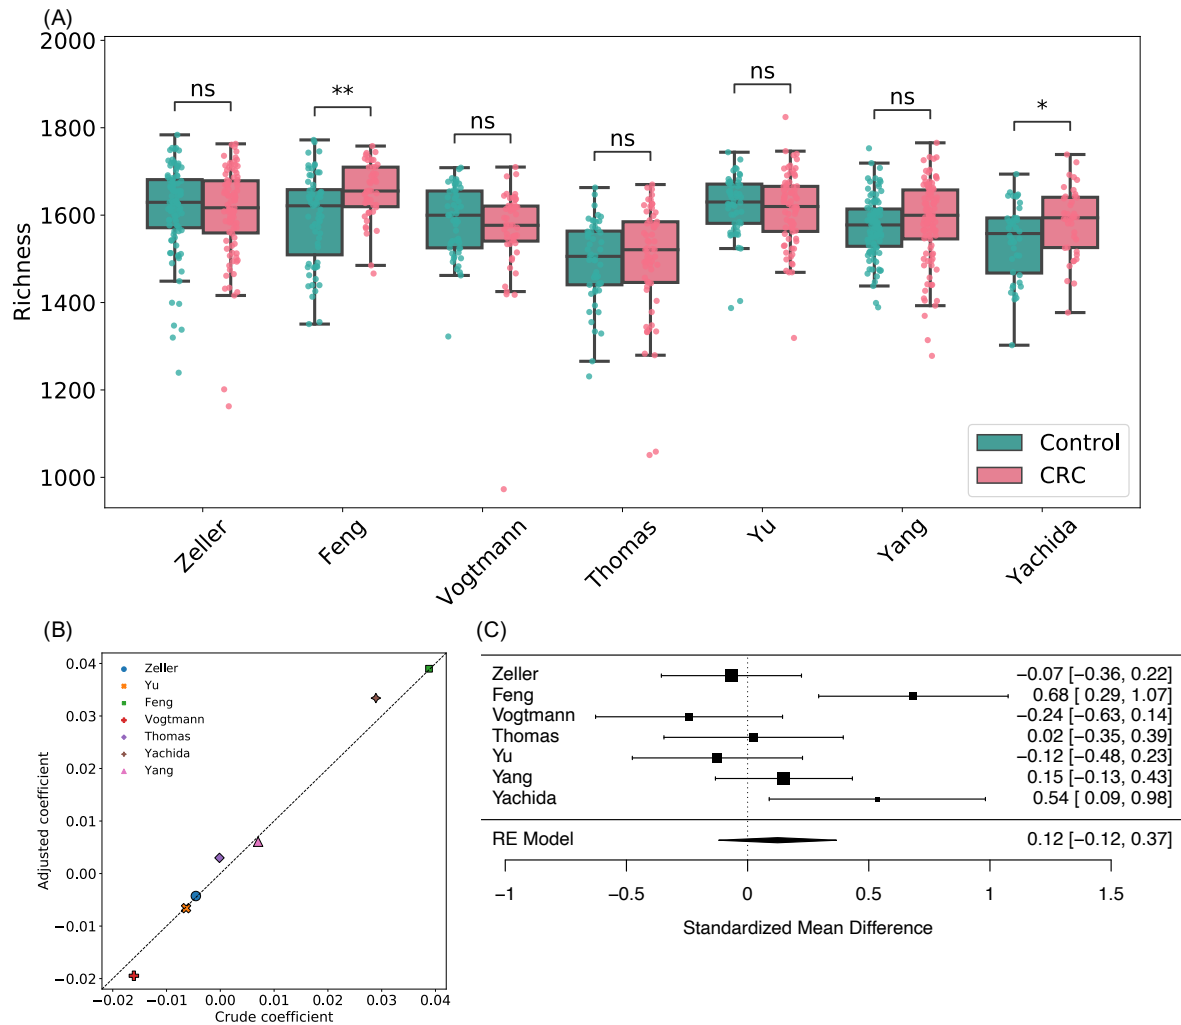

Figure S5: Analysis of viral species Chao1 richness within each dataset. **(A)** Boxplots of viral species-level Chao1 richness for gut samples of CRC subjects and healthy controls stratified by disease status in each dataset. BH adjusted p-values were calculated using the two-tailed Wilcoxon rank-sum test. ns:  $p > 0.05$ , \* $p < 0.05$ , \*\* $p < 0.01$ , \*\*\* $p < 0.001$ . **(B)** Multivariate analysis of the adjusted impact of age, gender and BMI on Chao1 richness. **(C)** Forest plot showing effect sizes from a meta-analysis on species-level richness ( $I^2 = 69.93\%$ , Q test p-value = 0.005). RE Model: Random effect model.

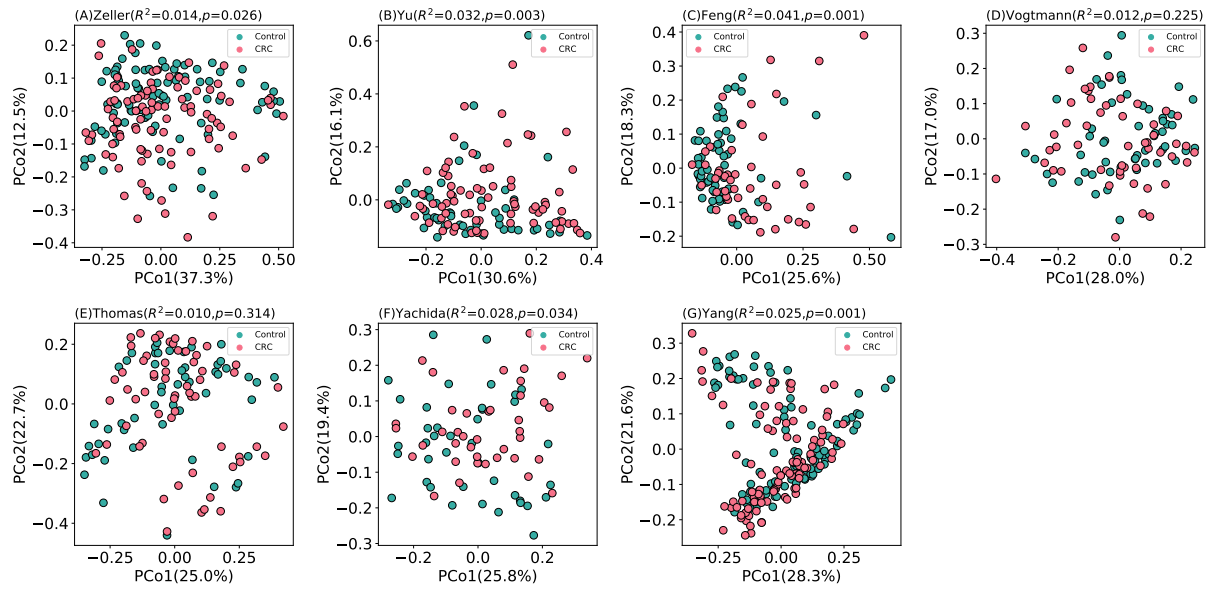

Figure S6: PCoA plot of gut samples of CRC subjects and healthy controls for each separate dataset.  $R^2$  values and p-values on subtitles were calculated by PERMANOVA to quantify the separation of the samples into two groups.

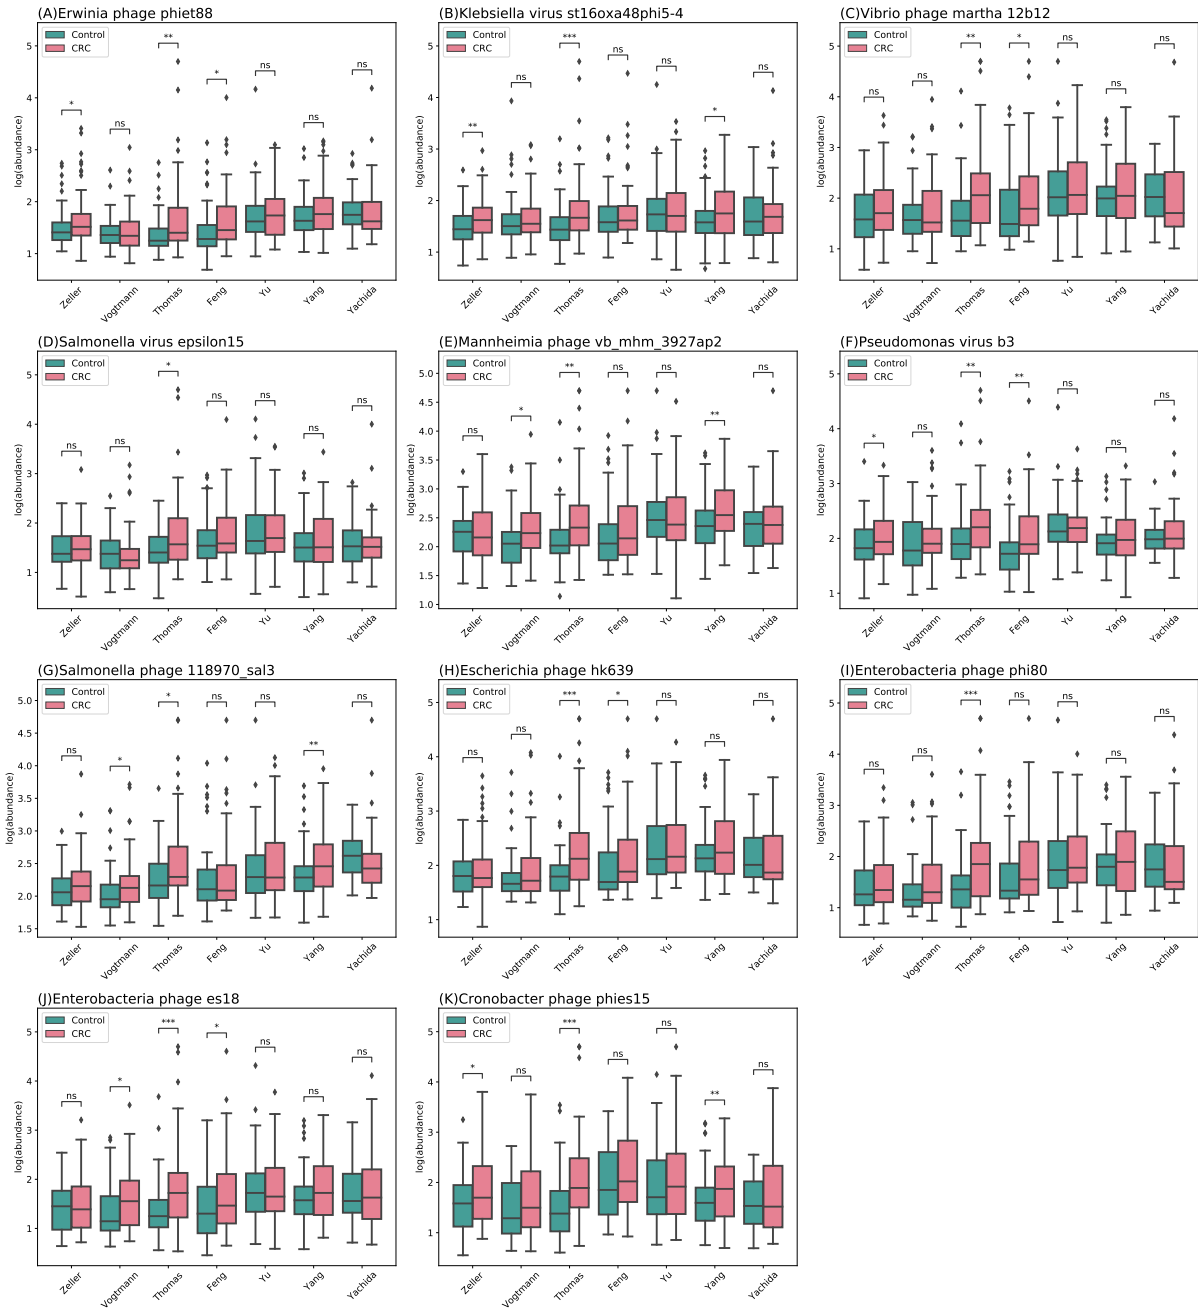

Figure S7: Boxplots showing the log transformed TMM normalized abundance of significant CRC-associated viral species within each dataset. P-values were calculated using the two-tailed Wilcoxon rank-sum test. ns:p> 0.05, \*p< 0.05, \*\*p< 0.01, \*\*\*p< 0.001, \*\*\*\*p< 0.0001.

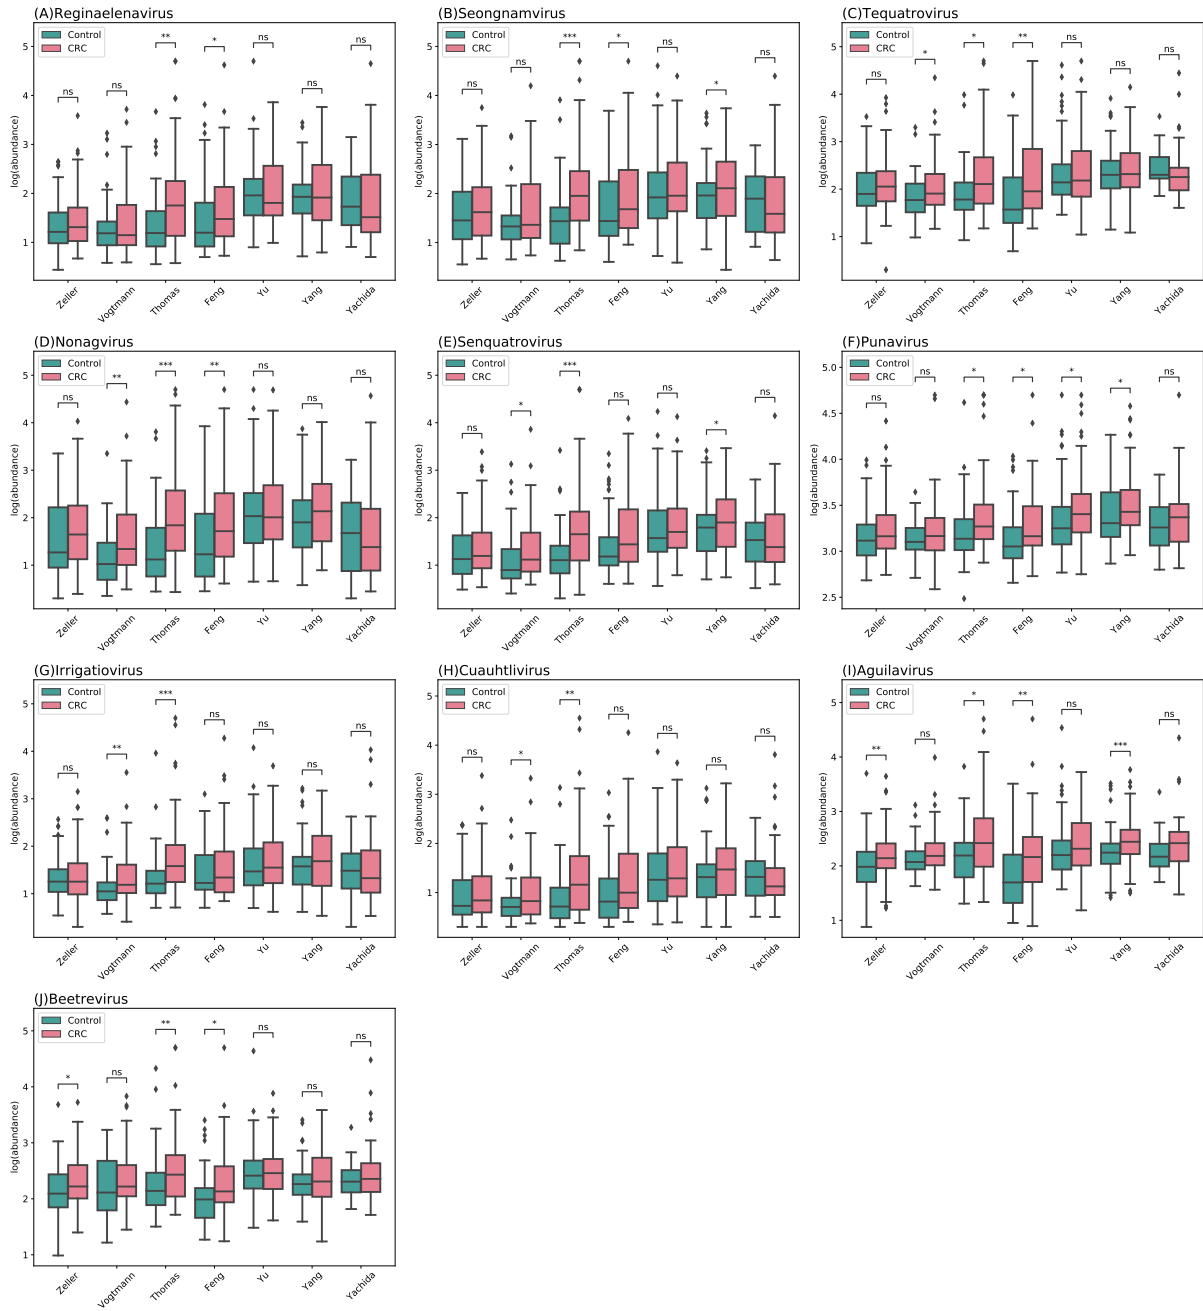

Figure S8: Boxplots showing the log transformed TMM normalized abundance of significant CRC-associated viral genera within each dataset. P-values were calculated using the two-tailed Wilcoxon rank-sum test. ns:p> 0.05, \*p< 0.05, \*\*p< 0.01, \*\*\*p< 0.001, \*\*\*\*p< 0.0001.

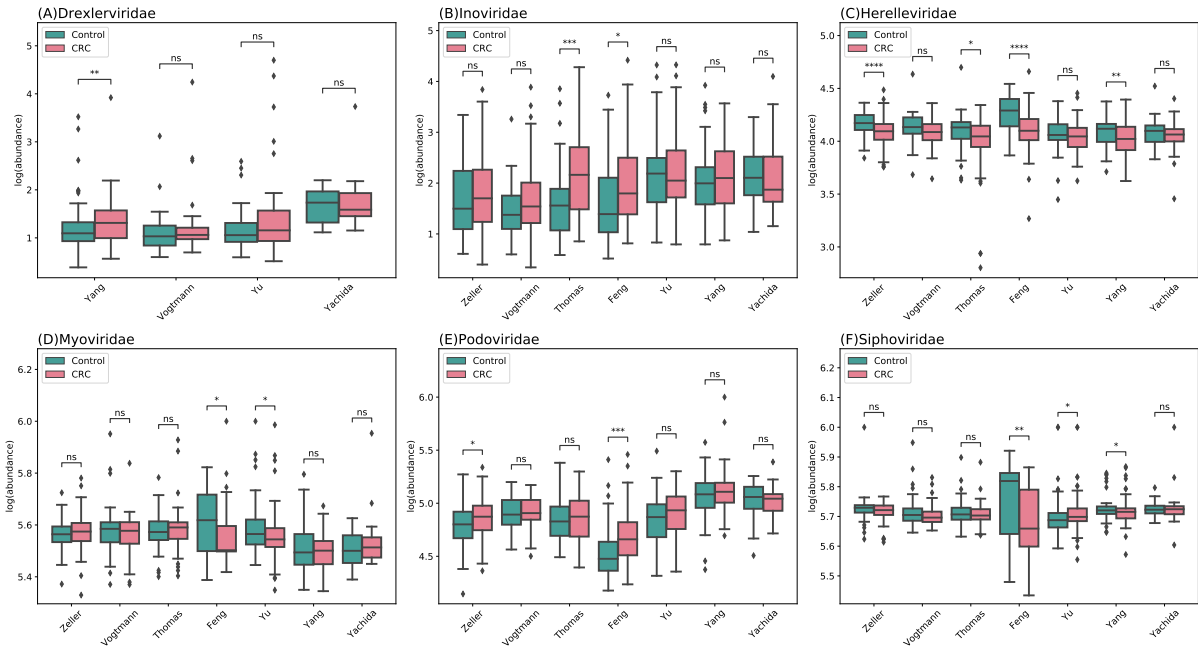

Figure S9: Boxplots showing the log transformed TMM normalized abundance of significant CRC-associated viral families ((**A**) Drexlerviridae, (**B**) Inoviridae, (**C**) Herelleviridae) and families to which significant CRC-associated viral species belong ((**D**) Myoviridae, (**E**) Podoviridae, (**F**) Siphoviridae) within each dataset. P-values were calculated using the two-tailed Wilcoxon rank-sum test. ns:p> 0.05, \*p< 0.05, \*\*p< 0.01, \*\*\*p< 0.001, \*\*\*\*p< 0.0001.



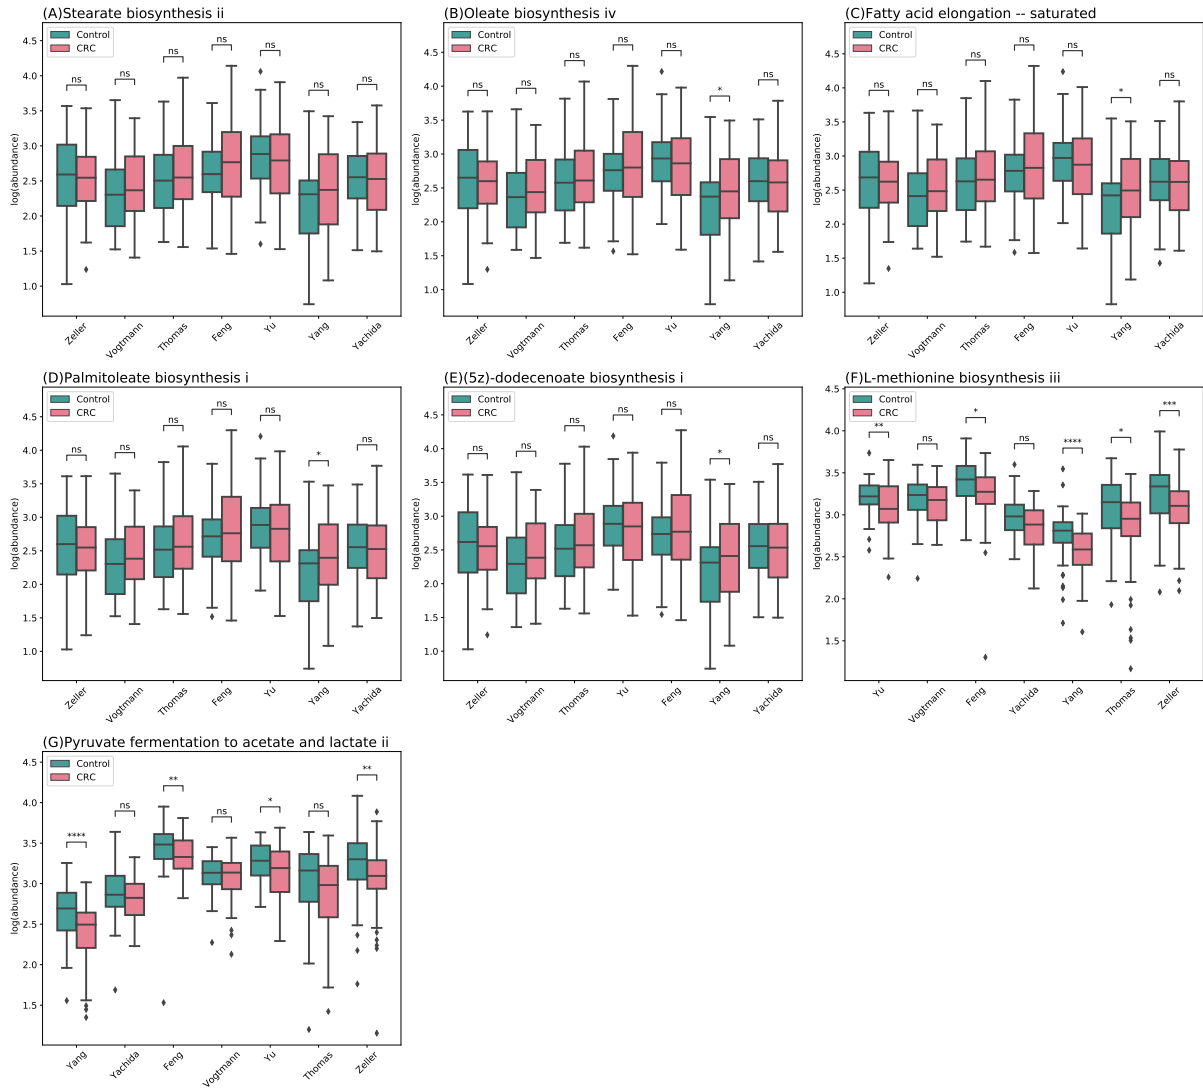

Figure S10: Boxplots showing the log transformed HUMAN3 pathway abundance of significant pathways within each dataset. P-values were calculated using the two-tailed Wilcoxon rank-sum test. ns:p > 0.05, \*p < 0.05, \*\*p < 0.01, \*\*\*p < 0.001, \*\*\*\*p < 0.0001.

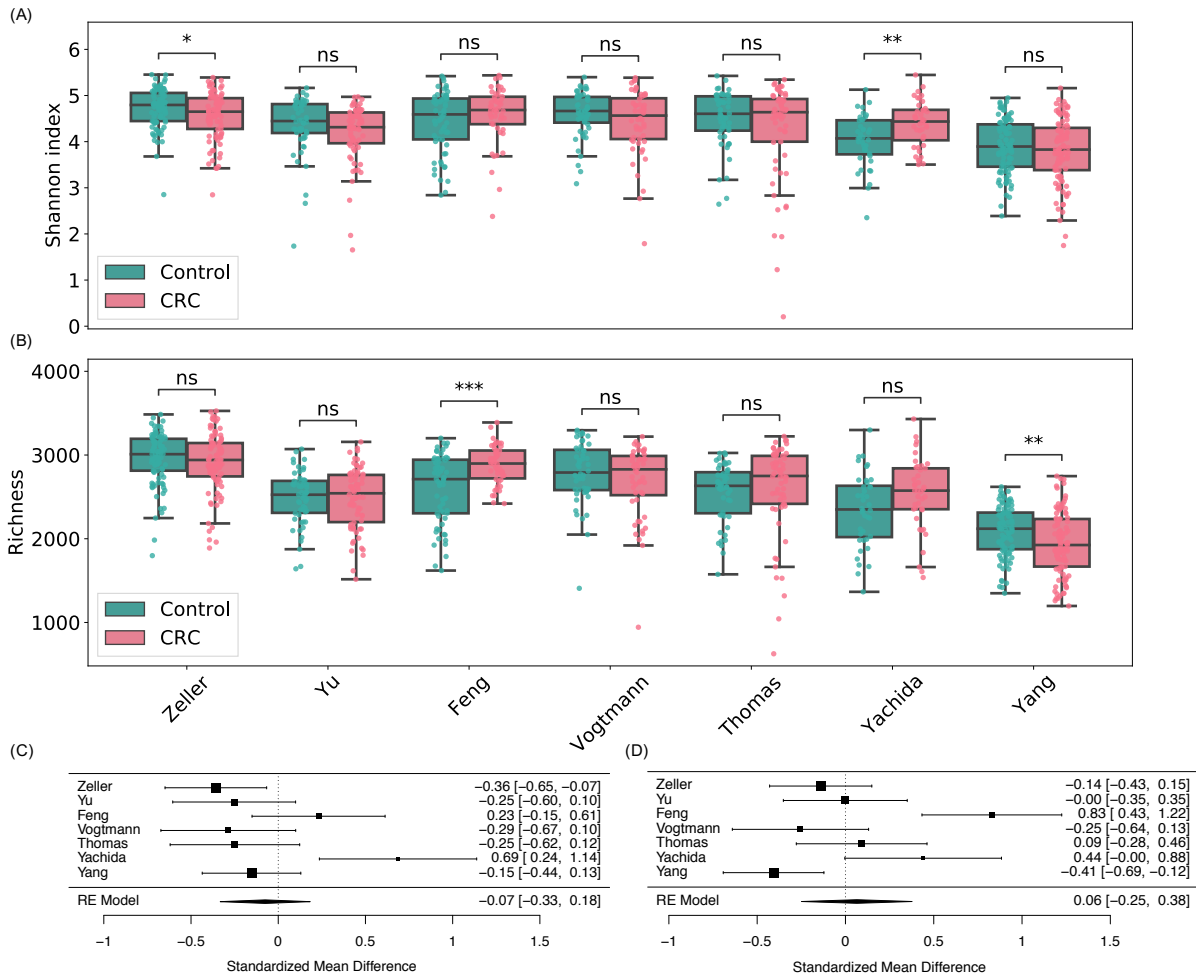

Figure S11: Alpha diversity of bacterial species. **(A)** Boxplots showing bacterial Shannon index. **(B)** Boxplots showing bacterial richness. P-values were calculated using the two-tailed Wilcoxon rank-sum test. ns:p> 0.05, \*p< 0.05, \*\*p< 0.01, \*\*\*p< 0.001, \*\*\*\*p< 0.0001. **(C)** Forest plot showing effect sizes from a meta-analysis on species-level bacterial diversity (meta-analysis  $I^2 = 73.31\%$ , Q test p-value = 0.0029). **(D)** Forest plot showing effect sizes from a meta-analysis on species-level bacterial richness (meta-analysis  $I^2 = 81.82\%$ , Q test p-value < 0.0001). RE Model: Random effect model.

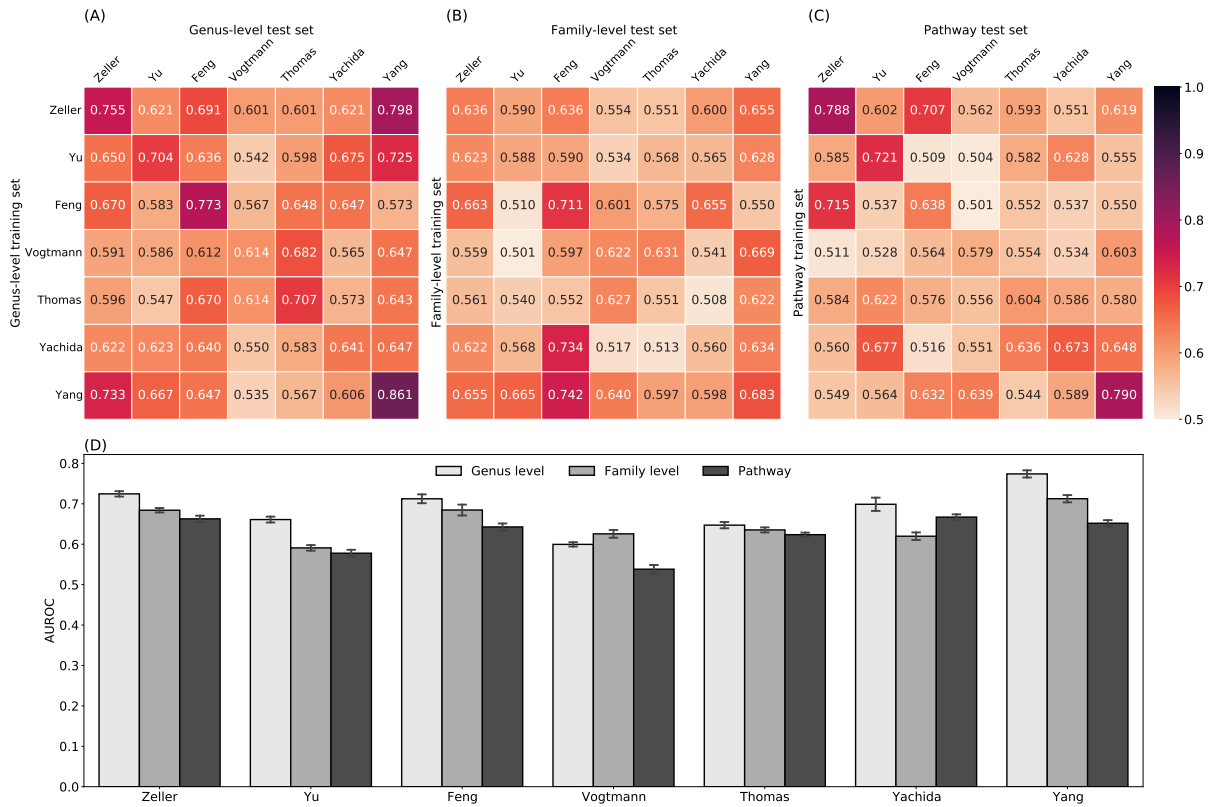

Figure S12: Prediction performances of random forest classifiers based on gut viral abundance. **(A)** Within and cross study AUROC matrix obtained by using genus-level abundance. The diagonal refers to results of cross validation within each dataset. Off-diagonal values refer to prediction results trained on the study on each row and tested on the study on each column. **(B)** Within and cross study AUROC matrix obtained by using family-level abundance. **(C)** Within and cross study AUROC matrix obtained by using pathway abundance. **(D)** LODO results with the x axis indicating the study left out as the validation set and other studies combined as the training set.

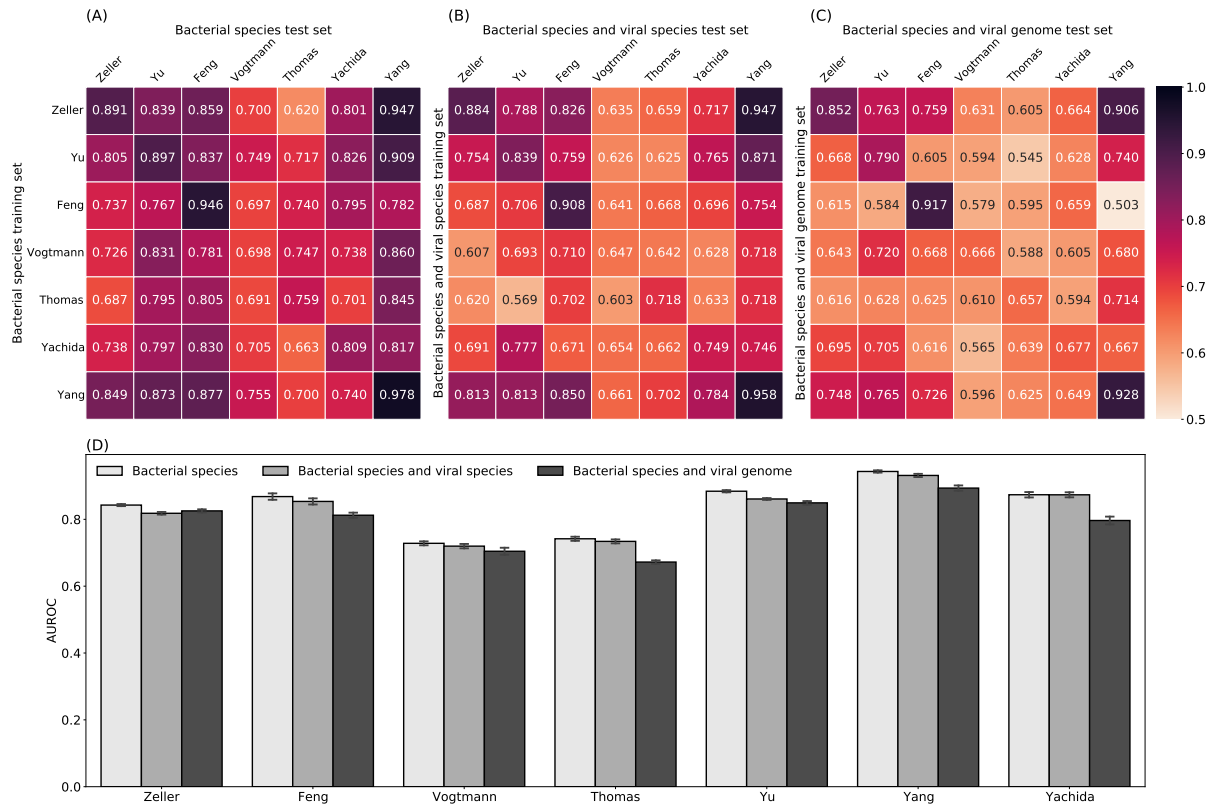

Figure S13: Prediction performances of random forest classifiers based on gut microbial abundance. **(A)** Within and cross study AUROC matrix obtained by using bacterial species-level abundance. The diagonal refers to results of cross validation within each dataset. Off-diagonal values refer to prediction results trained on the study on each row and tested on the study on each column. **(B)** Within and cross study AUROC matrix obtained by using both bacterial and viral species-level abundance profiles. **(C)** Within and cross study AUROC matrix obtained by using both bacterial species-level and viral genome-level abundance profiles. **(D)** LODO results with the x axis indicating the study left out as the validation set and other studies combined as the training set.
